# Supplementary material
Source: PubMed Central journal article supplement (PMC5444140)

**Fig. S1.** Circular dichroism in the far (A) and near (B) UV regions and fluorescence spectroscopy (C) are shown for PER-2  $\beta$ -lactamase variants. Panel D depicts the GdmCl-induced unfolding transitions as monitored by the total integrated fluorescence emission of proteins.

**Table S1.** Equilibrium unfolding parameters of wild-type PER-2  $\beta$ -lactamase and derived mutants in Arg220 and Thr237.

|           | $\Delta G^{\circ}_{\text{H}_2\text{O}} \text{ NI}$<br>(kcal . mol <sup>-1</sup> ) | $m \text{ NI}$<br>(kcal . mol <sup>-1</sup> . M <sup>-1</sup> ) | $\Delta G^{\circ}_{\text{H}_2\text{O}} \text{ IU}$<br>(kcal . mol <sup>-1</sup> ) | $m \text{ IU}$<br>(kcal . mol <sup>-1</sup> . M <sup>-1</sup> ) |
|-----------|-----------------------------------------------------------------------------------|-----------------------------------------------------------------|-----------------------------------------------------------------------------------|-----------------------------------------------------------------|
| PER-2 wt  | 3.7                                                                               | 4.6                                                             | 6.1                                                                               | 3.0                                                             |
| Arg220Leu | 2.8                                                                               | 4.1                                                             | 3.0                                                                               | 1.8                                                             |
| Arg220Ser | 2.0                                                                               | 5.1                                                             | 3.8                                                                               | 1.9                                                             |
| Arg220Gly | 5.0                                                                               | 7.8                                                             | 3.2                                                                               | 1.7                                                             |
| Arg220His | 1.9                                                                               | 6.7                                                             | 8.2                                                                               | 3.8                                                             |
| Arg220Thr | 3.9                                                                               | 9.5                                                             | 8.6                                                                               | 4.0                                                             |
| Arg220Cys | 2.1                                                                               | 6.7                                                             | 11.2                                                                              | 4.8                                                             |
| Thr237Ala | 3.2                                                                               | 6.0                                                             | 3.2                                                                               | 1.7                                                             |

**A**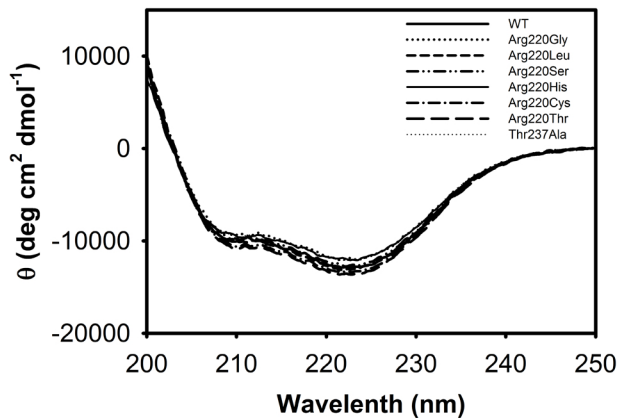**B**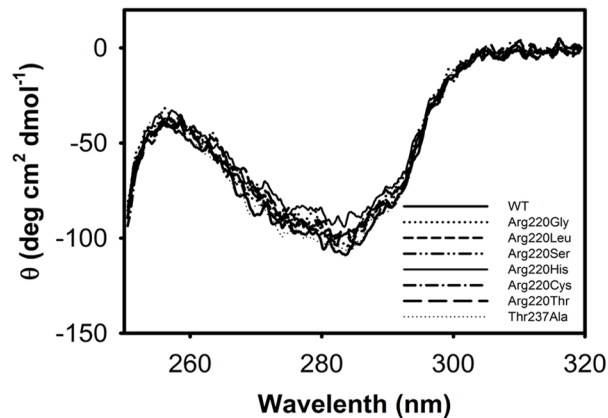**C**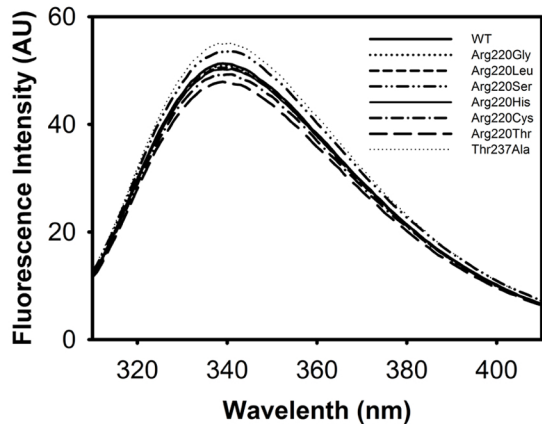**D**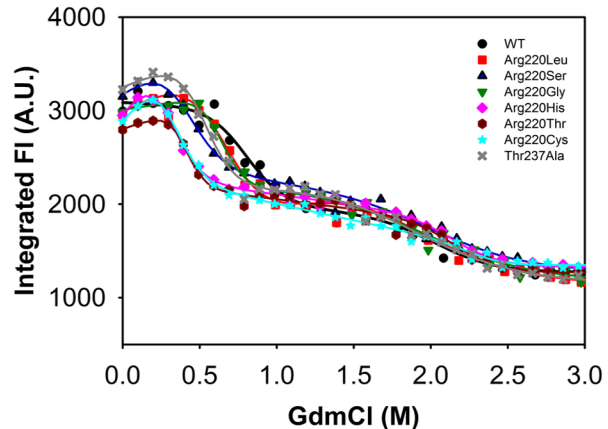

Supplement: AAC.02193-16_zac006176205s1.pdf [file AAC.02193-16_zac006176205s1.pdf]
